# Supplementary material for: Virtual Regional Fisheries Management Meetings in the Western and Central Pacific Ocean Region: A Preliminary Appraisal of Performance and Fit
Source: Frontiers journal article supplement (doi:10.3389/fmars.2021.710088), 2021-07-09
Supplement: Table_1.DOCX [file Table_1.DOCX]

**Supplementary Table 1:** List of countries contacted for questionnaire, and that participated in the study.

| **#** | **Countries and territories contacted by email** | **Completed one or more questionnaires (Y/N)** |
| --- | --- | --- |
| 1 | Australia | Y |
| 2 | Cook Islands | N |
| 3 | Federated States of Micronesia | Y |
| 4 | Fiji | N |
| 5 | Guam | N |
| 6 | Kiribati | Y |
| 7 | Marshall Islands | Y |
| 8 | Nauru | N |
| 9 | New Zealand | Y |
| 10 | New Caledonia | Y |
| 11 | Niue | N |
| 12 | Palau | N |
| 13 | Papua New Guinea | N |
| 14 | French Polynesia | N |
| 15 | Samoa | Y |
| 16 | Solomon Islands | Y |
| 17 | Tokelau | N |
| 18 | Tonga | Y |
| 19 | Tuvalu | Y |
| 20 | United States of America | Y |
| 21 | Vanuatu | Y |
| 22 | Wallis and Futuna | Y |
|  | **No direct contacts identified** |  |
| 23 | *American Samoa* |  |
| 24 | *Northern Marianas* |  |
